# Supplementary material
Source: publisher site journal article supplement (https://www.dovepress.com/article/292763)
Supplement: Supplementary file 1 [file get_supplementary_file.php]

**Appendix** Assessment of 30 random cases for image interpretation reliability using prevalence-adjusted and bias-adjusted kappa (PABAK) and overall percent agreement.

|  | PABAK | | Agreement for all scores | Agreement for scores 0 vs >0 |
| --- | --- | --- | --- | --- |
| PABAK | 95% CI |
| Anterior cruciate ligament | 0.91 | 0.79-1.00 | 93.3 | 93.3 |
| Posterior cruciate ligament | 1.00 |  | 100.0 | 100.0 |
| Medial collateral ligament | 0.54 | 0.33-0.76 | 63.3 | 70.0 |
| Lateral collateral ligament | 0.90 | 0.77-1.00 | 93.3 | 93.3 |
| Medial meniscus | 0.54 | 0.33-0.76 | 63.3 | 73.3 |
| Lateral meniscus | 0.75 | 0.57-0.94 | 80.0 | 80.0 |
| Medial cartilage | 0.50 | 0.28-0.72 | 60.0 | 63.3 |
| Lateral cartilage | 0.44 | 0.23-0.65 | 53.3 | 66.7 |
| Patellofemoral cartilage | 0.08 | 0-0.28 | 26.7 | 50.0 |
| Quadriceps tendon | 0.46 | 0.24-0.68 | 56.7 | 66.7 |
| Patella tendon | 0.00 |  | 13.3 | 30.0 |
| Semimembranosus tendon | 0.53 | 0.23-0.84 | 76.7 | 76.7 |
| Medial gastrocnemius | 0.50 | 0.25-0.75 | 66.7 | 76.7 |
| Lateral gastrocnemius | 0.80 | 0.59-1.00 | 90.0 | 90.0 |
| Popliteus tendon | 0.93 | 0.80-1.00 | 96.7 | 96.7 |
| Medial femoral condyle | 0.85 | 0.69-1.00 | 90.0 | 90.0 |
| Lateral femoral condyle | 0.85 | 0.69-1.00 | 90.0 | 90.0 |
| Medial tibial plateau | 0.93 | 0.80-1.00 | 96.7 | 96.7 |
| Lateral tibial plateau | 0.90 | 0.77-1.00 | 93.3 | 96.7 |
| Patella | 0.87 | 0.69-1.00 | 93.3 | 93.3 |
| Trochlea | 0.87 | 0.69-1.00 | 93.3 | 93.3 |
| Anterior cruciate ligament graft | 0.00 |  | 26.7 | 26.7 |
